1 Title: Hydrodynamic regime drives flow reversals in suction feeding larval fishes during early  
2 ontogeny

3 Krishnamoorthy Krishnan<sup>1</sup>, Asif Shahriar Nafi<sup>1</sup>, Roi Gurka<sup>1</sup>, Roi Holzman<sup>2,3</sup>

4

5 1) School of Coastal and Marine Systems Science, Coastal Carolina University, Conway,  
6 SC, 29526.

7 2) School of Zoology, Faculty of Life Sciences, Tel Aviv University, Tel Aviv 69978, Israel.

8 3) The Inter-University Institute for Marine Sciences, POB 469, Eilat 88103, Israel.

9 \* Corresponding author: Roi Holzman <[holzman@tauex.tau.ac.il](mailto:holzman@tauex.tau.ac.il)>

10

11 Keywords: *Sparus aurata*, Reynolds numbers, feeding kinematics

12

13

14

15

16 **Abstract**

17 Fish larvae are the smallest self-sustaining vertebrates. As such, they face multiple challenge  
18 that stem from their minute size, and from the hydrodynamic regime in which they dwell.  
19 This regime of intermediate Reynolds numbers ( $Re$ ) was shown to affect the swimming of  
20 larval fish and impede their ability to capture prey. Numerical simulations indicate that the  
21 flow fields external to the mouth in younger larvae result in shallower spatial gradients,  
22 limiting the force exerted on the prey. However, observations on feeding larvae suggest that  
23 failures in prey capture can also occur during prey transport, although the mechanism  
24 causing these failures is unclear. We combine high-speed videography and numerical  
25 simulations to investigate the hydrodynamic mechanisms that impede prey transport in  
26 larval fishes. Detailed kinematics of the expanding mouth during prey capture by larval  
27 *Sparus aurata* were used to parameterize age-specific numerical models of the flows inside  
28 the mouth. These models reveal that, for small larvae that slowly expand their mouth, not  
29 all the fluid that enters the mouth cavity is expelled through the gills, resulting in flow  
30 reversal at the mouth orifice. This efflux at the mouth orifice was highest in the younger  
31 ages, but was also high (>8%) in slow strikes produced by larger fish. Our modeling explains  
32 the observations of “in-and-out” events in larval fish, where prey enters the mouth but is  
33 not swallowed. It further highlights the importance of prey transport as an integral part in  
34 determining suction feeding success.

35

36

37

## 38 **Introduction**

39 Most marine fish reproduce by broadcasting small (~1 mm in diameter) eggs into the open  
40 ocean, providing no parental care from the hatching larvae (Blaxter, 1988; Cowen, 2002;  
41 Houde, 1987). Typically, larvae deplete their yolk sac after a couple of days (usually 3-7,  
42 depending on temperature and environmental conditions) and resort to feed autonomously  
43 to gain the necessary resources to complete their development (Blaxter, 1988; Cowen,  
44 2002; Houde, 1987). Despite the staggering variation in body size and life history strategies,  
45 the small eggs and larvae, and the lack of parental care, are nearly ubiquitous across marine  
46 fish (Barneche et al., 2018). Consequently, fish larvae are the smallest self-sustaining  
47 vertebrates. Almost all larval fishes feed in the pelagic realm using “suction feeding”, a  
48 characteristic behavior in which fish sequentially open their mouth, expand their buccal  
49 cavity and open the opercula covers to generate a unidirectional flow of water that carries  
50 their prey into the mouth (Day et al., 2015; Holzman et al., 2015).

51 In the wild, larval fish suffer dramatic mortality rates (Hjort, 1914; Houde, 1987). It is  
52 estimated that >90% of the brood is eradicated during the “critical period”, extending from  
53 the time of first feeding until the larvae is ready to settle in its juvenile habitat. During this  
54 period, larval fish undergo dramatic morphological and developmental changes, including  
55 the ossification of the cranium and vertebrae, the degradation of the fin fold and  
56 development of fin rays, as well as the continuous growth and development of the eyes  
57 (Blaxter, 1988; Kavanagh and Alford, 2003). Concomitantly, coordination and motor pattern  
58 change and improve (Westphal and O’Malley, 2013). The physical growth of the larvae,  
59 coupled with the development of stronger muscles that support faster movements lead to  
60 an ontogenetic transition in the ways larvae interact with their fluid environment (China and  
61 Holzman, 2014; Holzman et al., 2015). Being small and slow, young larvae live in a domain of

62 intermediate Reynolds numbers ( $Re$ ), in which viscous forces are non-negligible compared  
63 to inertial ones. This hydrodynamic regime was shown to impede the feeding rates of larval  
64 fishes, with 8 Days Post Hatch (DPH) *Sparus Aurata* larvae failing to capture non-evasive  
65 prey in ~80% of their feeding strikes (China and Holzman, 2014). Manipulations of the  
66 viscosity of the medium in which larvae fed demonstrated that the feeding rates of larvae  
67 were determined primarily by the hydrodynamic environment, described by the Reynolds  
68 numbers that characterized the feeding events (China and Holzman, 2014; Holzman et al.,  
69 2015). Older larvae (13 and 23DPH) that fed in a viscous medium displayed feeding rates  
70 equivalent to those of the 8DPH larvae in unmanipulated water. Larvae that were raised in  
71 mediums with increased viscosity expressed elevated levels of hunger-related  
72 neuropeptides (Koch et al., 2018) and suffered higher mortality rates (Yavno and Holzman,  
73 2018). Furthermore, the probability of executing successful prey-acquisition strikes  
74 increased with increasing  $Re$  number calculated for the suction feeding strike (China et al.,  
75 2017). Transition into higher  $Re$  also improves the larvae's ability to capture highly evasive  
76 prey such as copepods (Jackson and Lenz, 2016; Sommerfeld and Holzman, 2019; Yaniv et  
77 al., 2014).

78 Observations using high-speed videos indicate that one of the reasons for failure in  
79 prey acquisition strikes is the occurrence of "in-and-out" events, in which prey is carried into  
80 the mouth by the suction flows, but is expelled before the mouth is closed (China et al.,  
81 2017; Holzman et al., 2015). The suction flows in these "in-and-out" events were  
82 characterized by lower  $Re$  compared to those in successful events. Furthermore "in-and-  
83 out" strikes were initiated from a further distance and were slower compared to  
84 unsuccessful events in which the prey did not even enter the mouth (China et al., 2017). A  
85 flow visualization study reported flow reversals in larval zebrafish, that occurred in smaller

86 larvae at the time when the mouth started closing (Pekkan et al., 2016). This is in sharp  
87 contrast to adult fish, in which flow reversals are rare and minor (Jacobs and Holzman,  
88 2018). However, the extent of these flow reversals across species and developmental stages  
89 are unclear, as well as the hydrodynamic conditions under which they occur.

90 Here, we used computational fluid dynamics (CFD) to investigate the fluid dynamics  
91 of suction feeding larval fish. Following Yaniv et al (Yaniv et al., 2014), we constructed a  
92 model of an expanding buccal cavity, which incorporates an anterior-to-posterior wave of  
93 buccal expansion (Bishop et al., 2008) over time. Our modeling included the opening of the  
94 opercula covers at the posterior end of the mouth, a hallmark feature of suction feeding in  
95 fishes, which generate unidirectional flows into the mouth while it is closing (Van  
96 Wassenbergh, 2015). The model was parametrized based on observed strike kinematics of  
97 *Sparus aurata* larvae ranging from first feeding to metamorphosis. Using these kinematics,  
98 we quantified the flow speeds and the influx and efflux into the mouth and out of the gills  
99 for six larval ages. We then characterized the extent of flow reversals, the flow conditions in  
100 which they occur, and the role of hydrodynamics and kinematics (behavior) in driving these  
101 flow reversals.

102

## 103 **Methods**

### 104 *Study organisms*

105 We reanalyzed high-speed videos of suction feeding gilthead sea-bream larvae  
106 (*Sparus aurata* Linnaeus, 1758) feeding on Rotifers (*Brachionus rotundiformis*; ~0.16 mm in  
107 length), from dataset previously used in China and Holzman, 2014 and China et al., 2017. *S.*  
108 *aurata* is a pelagic spawner, hatching at ~3.5 mm. Feeding initiates at ~5 days post hatching  
109 (DPH) at a body length of ~4 mm. Larvae reach the stage of flexion at ~21-24 DPH, at a

110 length of 7-10 mm, depending on conditions. *Brachionus rotundiformis* is a species of  
111 planktonic rotifer, actively swimming at  $\sim 0.2 \text{ mm s}^{-1}$ . Prey swimming speed is an order of  
112 magnitude slower than the swimming speed of the larvae, and their escape response is  
113 considered weak (China and Holzman, 2014; China et al., 2017). Rotifers are universally used  
114 as the standard first-feeding food in the mariculture industry.

### 115 *High-speed videos*

116 Suction feeding events of larval fish were recorded using high speed video (500 and  
117 1000 frames per second) as described in (China and Holzman, 2014; China et al., 2017). In  
118 these experiments, fish swam freely in an aquarium, and their orientation with respect to  
119 the camera included lateral, dorsal and ventral views. From the larger dataset of prey  
120 acquisition strikes we selected 63 clips in which we could clearly track the kinematics of  
121 mouth opening as well as either the hyoid (using lateral view of the fish) or the opercula  
122 (using dorsal or ventral views) throughout prey acquisition strike. Clips were selected for  
123 fish at the ages of 8, 12-13, 17-18, 22-25, 30 and 35-37 DPH (hereafter 8, 13, 18, 23, 30 and  
124 37 DPH; 4-14 clips per age group). From the lateral view videos, we measured the time of  
125 mouth opening and closing, maximal mouth diameter, the time of initiation and peak hyoid  
126 displacement and its maximal excursion, and the time of opercula opening and closing  
127 (when clearly visible). From the dorsal and the ventral view videos, we measured the time of  
128 the mouth opening and closing, the time of initiation and peak opercula displacement and  
129 its maximal excursion, and the corresponding parameters at the base of the opercula (1<sup>st</sup> gill  
130 arch). To enable comparisons between different ages and strikes, we standardized the times  
131 of hyoid and opercula excursions by the time to peak gape opening (TTPG) in each clip, and  
132 their excursions by peak gape. Not all the parameters were visible in all the clips, resulting in  
133 a sparse matrix that was  $\sim 60\%$  full. We averaged the timing and excursion parameters for

134 each landmark, regressed them against larval age and used the predicted values from the  
135 regression to generate characteristic kinematics for each age (table 1).

### 136 *Geometry of the modeled buccal cavity*

137 We build on a previous model of mouth cavity expansion suggested by (Bishop et al.,  
138 2008; Yaniv et al., 2014), but added the opening of the opercular slits, a hallmark of suction  
139 feeding across fishes (Van Wassenbergh, 2015). In brief, the model was composed of three  
140 compartments of constant axial lengths,  $L_1$ ,  $L_2$  and  $L_3$  (Fig. 1). These compartments  
141 represented the region from the mouth opening to the anterior hyoid ( $L_1$ ), the region  
142 spanning the anterior to posterior length of the hyoid ( $L_2$ ) and the region posterior to the  
143 hyoid extending to the opening of the esophagus ( $L_3$ ). Mouth cavity expansion was  
144 simulated as time-dependent changes in the radii ( $R_1$ ,  $R_2$ ,  $R_3$ , and  $R_4$ ) of the bases of the  
145 compartments, parametrized according to the observed kinematics of the corresponding  
146 landmarks in our larvae (see above). The radius  $R_1$  represents the radius of the gape. The  
147 lengths  $B_1$ ,  $B_2$  and  $B_3$  of the lateral surfaces of each compartment varied with time to fit the  
148 length variations of the radii  $R_1$ ,  $R_2$  and  $R_3$ . We simulated mouth expansion for six larval ages  
149 (8, 13, 18, 23, 30 and 37 DPH) with increasing gape diameter and mouth lengths. Internal  
150 dimensions of  $L_1$ ,  $L_2$  and  $L_3$  were 25%, 30% and 45% of the total mouth cavity length  $L$ , and  
151 mouth radii before mouth expansion were set to 2.5% for  $R_1$  and  $R_4$ , and 5% for  $R_2$ - $R_3$  (Yaniv  
152 et al., 2014).

153 The pattern of mouth opening was simulated by varying the radii  $R(t)$  of each mouth  
154 section ( $R_1$ - $R_4$ ) using the following time-dependent exponential function (Eq. 1; modified  
155 from (Müller et al., 1982)):

$$156 \quad R(t) = R_0 + (R_{max} - R_0) \left[ \frac{t-t_0}{(t_{max}-t_0)} \exp \left( 1 - \frac{t_0-t}{(t_{max}-t_0)} \right) \right]^2 \quad (\text{Eq. 1})$$

157 Here,  $R_0=R(t=0)$ ,  $t_0$  is the time when  $R$  first deviates from  $R_0$  and  $t_{max}$  is the time  
158 when  $R$  is maximal ( $R=R_{max}$ ). Note that the radius of each mouth section can have different  
159  $R_0$ ,  $t_0$ ,  $R_{max}$  and  $t_{max}$  values (Table 1; Fig 3).

160 Feeding events used to parametrized our model were acquired using manually  
161 triggered high-speed cameras, a method which might be biased towards capturing more  
162 noticeable events i.e. faster or greater in excursion(China et al., 2017). Thus, they might  
163 have represented higher- performance strikes. To investigate the effect of low-effort strikes  
164 on the flow dynamics, we run our numerical simulations (see below) for the 23, 30, and 37  
165 DPH cases using the observed geometry but with the expansion kinematics and the relative  
166 timing of the 8 DPH case (time to peak gape of 57.3 ms, and time to peak  $R_2$ -  $R_4$  of 70.3, 73.1  
167 and 78.8 ms, respectively for all three models; Table 1).

#### 168 *Computational approach*

169 To simulate the fluid dynamics of the buccal cavity and characterize the flow moving  
170 in and out of the mouth cavity, a simplified model of an axi-symmetrical mouth cavity was  
171 designed. The boundaries of the mouth cavity in the simulations presents a simplified  
172 structure that has a cylindrical wall surrounding the cavity and unclosed inlet and outlet  
173 edges at the right and left ends, respectively. The cylindrical wall sections are comprised of  
174 three length sections that are flexibly connected, and their individual movement was  
175 prescribed by the measured kinematics as explained in the kinematics section. To represent  
176 the body of the fish and supplement the function of the gills, a streamlined elongated body  
177 with a length similar to mouth length was designed downstream the buccal cavity. The body  
178 had a small protruding part inside the cavity outlet, with a small ( $\sim 10^{-3}$  mm) gap from the  
179 buccal walls at  $t = 0$ . At  $t > 0$  the mouth started expanding, drawing the fluid in through the



180 gape, followed by the opening of the gap (the gills) based on the prescribed kinematics for  
181  $R_4$ .

182 The mouth cavity was immersed in a fluid-filled rectangular domain, and it was  
183 placed at the center of the domain. The rectangular fluid domain has six boundaries: inlet at  
184 the right end, outlet at the left end and four walls (at the top, bottom, far and near) such  
185 that uniform flow was formed to move in the domain from right to left. Water at standard  
186 atmospheric condition was used as fluid material in the domain. A velocity inlet boundary  
187 condition was used at the inlet with water flowing at  $13 \text{ mm s}^{-1}$  and pressure-outlet  
188 boundary condition with standard atmospheric pressure was set at the domain outlet. The  
189 top, bottom, far and near walls of the fluid domain, as well as the walls of the mouth cavity  
190 were represented with no-slip boundary condition. As the inlet and outlet of the mouth  
191 cavity were left unclosed, it is expected for the fluid to flow in and out of the mouth cavity  
192 naturally depending on its kinematics. To ensure that the domain size does not interfere  
193 with the flow inside and around the mouth cavity, the domain had sufficiently larger  
194 dimensions: approximately 30 times the mouth cavity length along the X-direction (flow  
195 direction) and 80 times the peak mouth opening radius along the Y-direction for each DPH  
196 cases.

197 The flow field due to expansion of the mouth cavity model was governed by the  
198 continuity and momentum conservation equations for incompressible viscous laminar fluid  
199 flow in the absence of body force (Ferziger and Peric, 2001). General governing equations  
200 for an unsteady, viscous laminar flow is given below.

$$\frac{\partial \rho}{\partial t} + \nabla \cdot \rho \mathbf{V} = 0,$$
$$\frac{\partial \mathbf{V}}{\partial t} + \mathbf{V} \cdot \nabla \mathbf{V} = -\frac{1}{\rho} \nabla p + \nu \nabla^2 \mathbf{V},$$

201 where  $\rho$  is fluid density,  $\mathbf{V}$  is the velocity vector,  $p$  is the pressure and  $v$  is the kinematic  
202 viscosity of the fluid. The flow governing equations were solved using finite volume based  
203 commercial software package ANSYS fluent (ANSYS, Canonsburg, Pennsylvania). Mouth  
204 cavity model was designed and meshed using ANSYS workbench (ANSYS, Canonsburg,  
205 Pennsylvania). Unstructured (triangular shape) mesh method was chosen to discretize the  
206 domain, the cavity and its boundaries. Relatively finer meshes were built inside and around  
207 the mouth cavity while coarser meshes were used in the domain away from the cavity. To  
208 simulate the expansion of the mouth cavity, dynamic mesh method was utilized. The  
209 dynamic meshing corresponds to changing of the mesh geometry over time and space  
210 based on the prescribed kinematics of the cavity. The kinematic motion of the mouth cavity  
211 was prescribed within the fluent solver using the user defined function  
212 'DEFINE\_GRID\_MOTION' (Ansys, 2009; Van Wassenbergh, 2015). This procedure was  
213 performed using a user defined function that was compiled and assigned to each length  
214 sections of the mouth cavity. Local cell re-meshing method was chosen to re-mesh the mesh  
215 grids for every two timesteps based on minimum and maximum cell length and maximum  
216 skewness parameters of each cell. To solve the flow equations, a SIMPLE scheme (Ansys,  
217 2009) was employed to carry out the pressure-velocity calculations. Spatial discretization  
218 was assigned with second order least square cell-based gradients method whilst a first order  
219 implicit method was used for time discretization. The complete numerical solution was  
220 obtained by ensuring that the convergence criteria of  $10^{-4}$  for the continuity and the flow  
221 speed components are attained. Before proceeding with the final simulations, mesh  
222 convergence study was carried out to confirm stable solution is achieved and the mesh does  
223 not influence the solution. For instance, for the 8 DPH case, we built three different meshes  
224 with approximately, 90,000 cells, 140,000 cells and 300,000 cells. Mesh validation was

225 performed by comparing peak flow speed at both inlet and outlet for each mesh cases and  
226 observed less than 1% variation between mesh 2 and 3. Then mesh with 140,000 cells was  
227 chosen for the further simulation. Irrespectively for all the DPH cases the movement of  
228 mouth cavity was simulated for 280 ms with 2,800 timesteps (each  $10^{-4}$  s).

229 Flow speed at the inlet and outlet at each time step was calculated as the average of  
230 flow speed across it. Correspondingly, peak flow speed was the flow speed at the time of  
231 maximal mouth opening. Flow rates were defined as the product of flow speed and the  
232 circular area of the inlet and outlet. Peak flow rate was flow rate at the time of maximal  
233 mouth opening. Reynolds number ( $Re$ ) was calculated as

$$Re = \frac{vL}{\nu}$$

234 where  $v$  is flow speed ( $\text{m s}^{-1}$ ),  $\nu$  is the kinematic viscosity of the fluid ( $\text{m}^2 \text{s}^{-1}$ ) and  $L$  is the  
235 characteristic length scale (m). We used the swimming speed of the larvae as the  
236 characteristic speed and the buccal length as the characteristic length.

237 Reynolds number was developed to characterize the flow in the case of steady flow  
238 within a long rigid tube with a fixed (time independent) radius. However, the suction flow is  
239 controlled by the rapid time-dependent motion of the cavity walls, and is characterized by  
240 strong temporal flow patterns, which needs to be considered. We therefore propose to use  
241 the Womersley number,  $\alpha^2$  which was formulated for pulsating flows mainly associated  
242 with cardiovascular systems (Womersley, 1955), and is calculated as:

$$\alpha^2 = \frac{\omega L^2}{\nu}$$

243 where  $\omega$  is the characteristic angular frequency ( $\text{s}^{-1}$ ),  $\nu$  is the kinematic viscosity of the fluid  
244 ( $\text{m}^2 \text{s}^{-1}$ ) and  $L$  is a characteristic length scale (gape; m). The Womersley number relates the  
245 pulsation flow frequency to viscous effects. Here, the angular frequency is calculated using

246 the time it takes the larvae to fully open its mouth (TTPG) such that  $\omega = 2\pi/TTPG$ . Note  
247 that we used different (although correlated) characteristic lengths for the Womersley and  
248 Reynolds, referring to buccal length and gape, respectively.

249

## 250 **Results**

251 To facilitate the comparison between fish species in which the growth rates can differ, we  
252 hereafter report on the scaling of suction feeding kinematics and dynamics with buccal  
253 length. As larvae mature from 8 DPH to 37 DPH, the length of the buccal cavity and the  
254 diameter of the mouth increase by about two-fold (Fig 2; Table 1). Concomitantly, the time  
255 to peak gape decreases by a factor of  $\sim 3.6$  from an average of 57.3 ms at 8 DPH to 15.6 at  
256 37 DPH. By and large, the kinematics observed in *S. aurata* larvae yielded unidirectional  
257 flows in our CFD models, i.e. fluid entering the mouth at the gape (inlet; Fig 5A) and exiting  
258 through the gills (outlet; Fig 5B). As previously reported (Yaniv et al., 2014), peak flow  
259 speeds at the mouth inlet ( $U_{\text{peak}}(\text{gape})$ ) increased with increasing buccal length (i.e. age;  $L$ ),  
260 following the exponential relationship  $U_{\text{peak}}(\text{gape}) = -0.56 \cdot \exp(3.39 L)$ ; (Fig 6A). Peak flow  
261 speed was  $28.3 \text{ mm s}^{-1}$  for the 8 DPH case and increased to 49.8 and  $136.2 \text{ mm s}^{-1}$  for the 23  
262 and 37 DPH cases. Correspondingly,  $Re$  increases by an order of magnitude (from 23 at 8  
263 DPH to 218 at 37 DPH).

264 Similarly, peak flow rate at the mouth inlet ( $Q_{\text{peak}}(\text{gape})$ ) increased with increasing  
265 buccal length from  $0.58 \text{ mm}^3 \text{ s}^{-1}$  for the 8 DPH case to 2.96 and  $8.37 \text{ mm}^3 \text{ s}^{-1}$  for the 23 and  
266 37 DPH cases, following an exponential relationship  $Q_{\text{peak}}(\text{gape}) = -0.021 \cdot \exp(3.71 L)$  (Fig 6c).  
267 Peak flow rate at the outlet  $Q_{\text{peak}}(\text{gills})$  increased with increasing buccal length from 0.13  
268  $\text{mm}^3 \text{ s}^{-1}$  for the 8 DPH case to 0.93 and  $2.26 \text{ mm}^3 \text{ s}^{-1}$  for the 23 and 37 DPH cases, following  
269 an exponential relationship  $Q_{\text{peak}}(\text{gills}) = -0.0056 \cdot \exp(3.7 L)$ .

270 While the observed kinematics in all cases (8-37 DPH) resulted in a net influx into the  
271 gape (inlet), we observed considerable efflux (flow reversals) around the time of mouth  
272 closure (Fig 5B). These flow reversals were most pronounced for models depicting suction  
273 feeding in young (8 and 13 DPH) ages, where efflux out of the gape was ~10% and ~3% of  
274 the influx into the cavity, respectively (Fig 6). Efflux decreased sharply for the cases of 18-37  
275 DPH (Fig 6). Plotting the Reynolds *versus* Womersley numbers for all our cases (Fig 7)  
276 indicated that efflux at the mouth (flow reversals) was > 3% of the influx for the smaller  
277 larvae, characterized by  $Re < 50$  and  $a^2 < 4$ . Furthermore, running the model for the 23, 30  
278 and 37 DPH cases using the observed morphology excursions but the kinematics of the 8  
279 DPH case yielded high efflux (~7-8%), similar to the ones obtained for the 8 DPH case (Fig 7).

280

## 281 Discussion

282 In this study, we used computational fluid dynamics (CFD) to investigate the fluid dynamics  
283 of suction feeding larval fish. Using observed strike kinematics of *Sparus aurata* larvae  
284 ranging from first feeding to metamorphosis to parametrize the model, we quantified the  
285 flow speeds and the influx and efflux into the mouth and out of the gills for six larval ages.  
286 As larvae grow, their buccal cavity elongated and its radii increase, and it expands faster (Fig  
287 2, Table 1). These kinematics leads to an increase in the maximal flow speed and flow rate  
288 observed at the orifice (Fig 5, 6). While most of the fluid entrained in the cavity is evacuated  
289 through the gills, we observed high efflux of water flowing outwards from the gape (Fig 5,7).  
290 These flows occurred predominantly in the models characterized by  $Re < 50$  and  $a^2 < 4$ , but  
291 also in our larger models during slow mouth opening. Overall, our results show that the  
292 inability of larval fish to capture prey may result from (at least) two hydrodynamic  
293 mechanisms: (1) their suction force do not exert sufficient force to draw the prey into the

294 mouth (Yaniv et al., 2014), and (2) flow reversals may carry the prey outside as the mouth  
295 closes if the prey did not get deep enough into the mouth (this study; (China et al., 2017;  
296 Holzman et al., 2015)).

297 Previous observations of larval feeding on non-evasive prey indicate the prevalence of  
298 “in-and-out” events where prey that entered the mouth was expelled before the mouth  
299 closed (China et al., 2017; Holzman et al., 2015). The probability of these “in-and-out”  
300 events increased in suction feeding events characterized by low  $Re$  ( $<20$ ), compared to  
301 successful events characterized by higher  $Re$  of  $>40$  (China et al., 2017). This observation is  
302 in agreement with our results, indicating the prevalence of high efflux (flow reversals) under  
303 low  $Re$ , a condition characterizing younger larvae or older larvae that execute low-effort  
304 strikes. Furthermore, flow reversal in the models occurred later in the strike, as the mouth  
305 was closing. This timing corresponds to the observation of the “in-and-out” events, and the  
306 fact that they were initiated from a further distance compared to unsuccessful events in  
307 which the prey did not enter the mouth at all (China et al., 2017). A flow visualization study  
308 reported flow reversals in larval zebrafish, occurring in when the mouth starts closing  
309 (Pekkan et al., 2016). However, that study did not report the hydrodynamic or kinematic  
310 correlates were associated with their occurrence. For larger fish that operate at higher  $Re$   
311 ( $Re >55$  for 75% of  $>400$  PIV measurements; (Jacobs and Holzman, 2018)) such flow  
312 reversals were extremely rare. In general, whether prey transport during suction feeding  
313 can hinder feeding success is rarely demonstrated.

314 Reynolds number is commonly used to characterize the suction flow field for adults  
315 and well as larval fishes (China and Holzman, 2014; China et al., 2017; Hernández, 2000;  
316 Holzman et al., 2015). Reynolds number provides the ratio between inertia and viscous  
317 forces; as Reynolds increase, inertia forces are considered dominated over viscous ones and

318 vice versa. Reynolds number is frequently used to determine if the flow is laminar or  
319 turbulent (Denny and Wethey, 2001; Vogel, 1994) and for specific configurations, critical  
320 Reynolds numbers were proposed. However, given the nature of the flow within the buccal  
321 cavity, we suggest that Reynolds might not convey all the information needed to  
322 characterize the fluid phenomena. Reynolds number was developed to characterize the flow  
323 in the case of steady flow within a long rigid tube with a fixed (time independent) radius.  
324 However, the suction flow is a pressure driven flow, controlled by the rapid time-dependent  
325 motion of the cavity walls (Day et al., 2015). Hence, the boundary conditions change as the  
326 cavity opens and close over a short period of time, indicating that suction feeding is not only  
327 a pressure driven phenomena but also a transient one. Therefore, one should consider, in  
328 addition to the inertia and viscous effects, the temporal ones. Furthermore, to characterize  
329 a suction feeding event based on  $Re$ , one should choose a characteristic lengths and speed  
330 out of several possible options: for example one could justify using peak gape, or gape at  
331 the time of peak flow speed, or mean gape, and that choice would change the calculated  $Re$ .  
332 We therefore proposed to use the Womersley number,  $\alpha^2$  which was formulated for  
333 pulsating flows mainly associated with cardiovascular systems (Womersley, 1955). While it  
334 is acknowledged that, for the case of suction feeding the repetition rate is low (i.e. unlike  
335 cardiovascular systems, the time between consecutive suction events is relatively long), the  
336 temporal parameter is dominant. Admittedly, Reynolds and Womersley numbers for  
337 different cases can be correlated because in some instances the length scales (gape and  
338 mouth length) are correlated, as well as the suction flow speed can be correlated with gape  
339 size and TTPG (Jacobs and Holzman, 2018), however we advise that future studies of suction  
340 feeding dynamics report the relevant Womersley number for their case. We re-analyzed  
341 data from (China et al., 2017) and found that failed strikes were characterized by mean

342  $\alpha^2 = 1.01 \pm 0.5$ , “in and out” events had  $\alpha^2 = 1.31 \pm 0.46$  and successful strikes had  
343  $\alpha^2 = 2.16 \pm 1.33$ , supporting the usefulness of  $\alpha^2$  to understand larval feeding.

344 We suggest that the flow reversals stem from the boundary layer that develops near  
345 the mouth’s walls, slowing the flow through the mouth. To approximately calculate the  
346 boundary layer thickness ( $\delta_{BL}$ ) inside the mouth cavity and to illustrate its trend as a  
347 function of the mouth length and DPH, we utilized Blasius’s boundary layer theory for low-  
348 viscosity flow over a long plate (Falkneb and Skan, 1931). While several assumptions of the  
349 Blasius’s solution were not met in our case (e.g. steady flow over long flat plate with no  
350 pressure gradients along the flow direction), this solution should reasonably predict the  
351 trend in the thickness of the boundary layer. According to this solution, the boundary layer  
352 thickness is approximated as:

$$\delta_{BL} = \frac{5.0}{\sqrt{Re_L}}$$

353 where  $Re_L$  is the Reynolds number based on the length of semi-infinite plate. In our case,  
354 we choose to estimate the boundary later thickness over the second axial length ( $L_2$ ) of the  
355 mouth cavity at an instant after the peak mouth opening where the  $L_2$  is almost flat and  
356 parallel to the downstream flow. We identified the time instant for the case of each DPH  
357 such as 80.4 ms, 80.4 ms, 77.5 ms, 71.7 ms, 51.5 ms, and 34.4 ms for 8, 13, 18, 23, 30, and  
358 37 DPH, respectively. At a given time, the flow velocity of the region inside the cavity over  
359 the length,  $L_2$  alone was averaged and this averaged flow velocity and the length,  $L_2$  was  
360 used to calculate the Reynolds number ( $Re_L$ ). As expected, the thickness of the boundary  
361 layer decreased with increasing age. The degree of efflux exponentially increased as a  
362 function of the ratio between boundary layer thickness and gape diameter, suggesting that



363 the development of slower flows near the cavity walls and the mouth openings could be  
364 responsible for the flow reversal.

365 Previous measurements (Pekkan et al., 2016), modeling (Yaniv et al., 2014) and  
366 estimations based on buccal dynamics (China et al., 2017) reported peak suction flows  
367 ranging  $\sim 1\text{-}40\text{ mm s}^{-1}$ , for range of buccal length parameters (i.e. gape diameter)  
368 corresponding to the current study. While PIV measurements and CFD simulations of larval  
369 fish represent a limited sample of individuals, high-speed videos suggest that the variation  
370 in peak flow speed among individuals can be substantial (China et al., 2017). Similarly, PIV  
371 studies on adult fish indicate broad variation in peak flow speed for repeated strikes by the  
372 same individuals (Day et al., 2015; Holzman et al., 2008; Jacobs and Holzman, 2018). Such  
373 variation was not included in our study. Moreover, we base our modeling based on feeding  
374 events acquired using manually triggered high-speed cameras, and it is more likely that an  
375 observer operating it will notice and trigger an event when it is faster and greater in  
376 excursion. Thus, one should use the flow velocities estimated in our study as an example of  
377 high, rather than average, larval performance.

378

379

380 **References**

- 381 **Ansys, F.** (2009). *12.0 Theory Guide*. 5.5. Ansys Inc.
- 382 **Barneche, D. R., Burgess, S. C. and Marshall, D. J.** (2018). Global environmental drivers of  
383 marine fish egg size. *Glob. Ecol. Biogeogr.* **27**, 890–898.
- 384 **Bishop, K. L., Wainwright, P. C. and Holzman, R.** (2008). Anterior-to-posterior wave of  
385 buccal expansion in suction feeding fishes is critical for optimizing fluid flow velocity  
386 profile. *J. R. Soc. Interface* **5**, 1309–16.
- 387 **Blaxter, J. H. S.** (1988). 1 Pattern and Variety in Development. *Fish Physiol.* **11**, 1–58.
- 388 **China, V. and Holzman, R.** (2014). Hydrodynamic starvation in first-feeding larval fishes.  
389 *Proc. Natl. Acad. Sci. U. S. A.* **111**, 8083–8.
- 390 **China, V., Levy, L., Liberzon, A., Elmaliach, T. and Holzman, R.** (2017). Hydrodynamic  
391 regime determines the feeding success of larval fish through the modulation of strike  
392 kinematics. *Proc. R. Soc. B Biol. Sci.* **284**,.
- 393 **Cowen, R. K.** (2002). Chapter 7 - Larval Dispersal and Retention and Consequences for  
394 Population Connectivity. In *Coral Reef Fishes. Dynamics and Diversity in a Complex*  
395 *Ecosystem* (ed. Sale, P. F.), pp. 149–170. San Diego: Academic press.
- 396 **Day, S. W., Higham, T. E., Holzman, R. and Van Wassenbergh, S.** (2015). Morphology,  
397 Kinematics, and Dynamics: The Mechanics of Suction Feeding in Fishes. *Integr. Comp.*  
398 *Biol.* **55**, 21–35.
- 399 **Denny, M. and Wethey, D.** (2001). Physical processes that generate patterns in marine  
400 communities. In *Marine Community Ecology* (ed. Bertness, M. D.), Gaines, S. D.), and  
401 Hay, M. E.), pp. 3–37. Sunderland, MA (USA): Sinauer Associates.
- 402 **Falkneb, V. M. and Skan, S. W.** (1931). LXXXV. *Solutions of the boundary-layer equations.*  
403 *London, Edinburgh, Dublin Philos. Mag. J. Sci.* **12**, 865–896.

- 404 **Ferziger, J. H. and Peric, M.** (2001). *Computational methods for fluid dynamics*. Springer.
- 405 **Hernández, L. P.** (2000). Intraspecific scaling of feeding mechanics in an ontogenetic series  
406 of zebrafish, *Danio rerio*. *J. Exp. Biol.* **203**, 3033–43.
- 407 **Hjort, J.** (1914). Fluctuations in the great fisheries of northern Europe. Rapp. Pa-V. *Reun.*  
408 *Cons. Perm. Int. Explor. Mer* **19**, 1–228.
- 409 **Holzman, R., Collar, D. C., Day, S. W., Bishop, K. L. and Wainwright, P. C.** (2008). Scaling of  
410 suction-induced flows in bluegill: morphological and kinematic predictors for the  
411 ontogeny of feeding performance. *J. Exp. Biol.* **211**, 2658–68.
- 412 **Holzman, R., China, V., Yaniv, S. and Zilka, M.** (2015). Hydrodynamic Constraints of Suction  
413 Feeding in Low Reynolds Numbers, and the Critical Period of Larval Fishes. *Integr.*  
414 *Comp. Biol.* **55**, 48–61.
- 415 **Houde, E. D.** (1987). Fish Early Life Dynamics and Recruitment Variability. In *American*  
416 *Fisheries Society Symposium*, pp. 2: 17-29.
- 417 **Jackson, J. M. and Lenz, P. H.** (2016). Predator-prey interactions in the plankton: larval fish  
418 feeding on evasive copepods. *Sci. Rep.* **6**, 33585.
- 419 **Jacobs, C. and Holzman, R.** (2018). Conserved spatio-temporal patterns of suction-feeding  
420 flows across aquatic vertebrates: a comparative flow visualization study. *J. Exp. Biol.*  
421 **221**, 1:11.
- 422 **Kavanagh, K. D. and Alford, R. A.** (2003). Sensory and skeletal development and growth in  
423 relation to the duration of the embryonic and larval stages in damselfishes  
424 (Pomacentridae). *Biol. J. Linn. Soc.* **80**, 187–206.
- 425 **Koch, L., Shainer, I., Gurevich, T. and Holzman, R.** (2018). The Expression of agrp1 , A  
426 Hypothalamic Appetite-Stimulating Neuropeptide, Reveals Hydrodynamic-Induced  
427 Starvation in a Larval Fish. *Integr. Org. Biol.* **1**,

- 428 **Pekkan, K., Chang, B., Uslu, F., Mani, K., Chen, C. Y. and Holzman, R.** (2016).  
429 Characterization of zebrafish larvae suction feeding flow using PIV and optical  
430 coherence tomography. *Exp. Fluids* **57**,.
- 431 **Sommerfeld, N. and Holzman, R.** (2019). The interaction between suction feeding  
432 performance and prey escape response determines feeding success in larval fish. *J. Exp.*  
433 *Biol.* **222**, jeb204834.
- 434 **Van Wassenbergh, S.** (2015). A Solution Strategy to Include the Opening of the Opercular  
435 Slits in Moving-Mesh CFD Models of Suction Feeding. *Integr. Comp. Biol.* **55**, 62–73.
- 436 **Vogel, S.** (1994). *Life in moving fluids: the physical biology of flow. Second edition.* Princeton  
437 University Press.
- 438 **Westphal, R. E. and O'Malley, D. M.** (2013). Fusion of locomotor maneuvers, and improving  
439 sensory capabilities, give rise to the flexible homing strikes of juvenile zebrafish. *Front*  
440 *Neural Circuits* **7**, 108.
- 441 **Womersley, J. R.** (1955). Method for the calculation of velocity, rate of flow and viscous  
442 drag in arteries when the pressure gradient is known. *J. Physiol.* **127**, 553–563.
- 443 **Yaniv, S., Elad, D. and Holzman, R.** (2014). Suction feeding across fish life stages: flow  
444 dynamics from larvae to adults and implications for prey capture. *J. Exp. Biol.* **217**,  
445 3748–57.
- 446 **Yavno, S. and Holzman, R.** (2018). Do viscous forces affect survival of marine fish larvae?  
447 Revisiting the 'safe harbour' hypothesis. *Rev. Fish Biol. Fish.* **28**, 201–212.  
448

449 Table 1: kinematics characteristics of larval fish used to parametrize the numerical model

| Age (DPH)           | Buccal cavity length (mm) | Maximal gape diameter (mm) | Swimming speed (mm/s) | Time to peak gape (s) | $Re_L$ | inlet                  |                                     | outlet                 |                                     | $\frac{Efflux}{influx}$ at inlet (%) |
|---------------------|---------------------------|----------------------------|-----------------------|-----------------------|--------|------------------------|-------------------------------------|------------------------|-------------------------------------|--------------------------------------|
|                     |                           |                            |                       |                       |        | Peak flow speed (mm/s) | Peak flow rate (mm <sup>3</sup> /s) | Peak flow speed (mm/s) | Peak flow rate (mm <sup>3</sup> /s) |                                      |
| Observed kinematics |                           |                            |                       |                       |        |                        |                                     |                        |                                     |                                      |
| 8                   | 0.81                      | 0.11                       | 8.1                   | 57.3                  | 22.8   | 28.3                   | 0.58                                | 8.50                   | 0.13                                | 10.1                                 |
| 13                  | 1.06                      | 0.15                       | 10.6                  | 50.1                  | 24.4   | 23.1                   | 1.37                                | 11.1                   | 0.35                                | 3.1                                  |
| 18                  | 1.23                      | 0.17                       | 12.3                  | 42.9                  | 44.1   | 35.9                   | 2.24                                | 14.3                   | 0.61                                | 1.3                                  |
| 23                  | 1.36                      | 0.19                       | 13.6                  | 35.7                  | 67.6   | 49.8                   | 2.96                                | 17.3                   | 0.93                                | 0.34                                 |
| 30                  | 1.50                      | 0.21                       | 15.0                  | 25.7                  | 121.3  | 81.3                   | 5.22                                | 17.4                   | 1.12                                | 0.26                                 |
| 37                  | 1.61                      | 0.23                       | 16.1                  | 15.6                  | 218.2  | 136.2                  | 8.36                                | 30.9                   | 2.26                                | 0.06                                 |
| Low effort strikes  |                           |                            |                       |                       |        |                        |                                     |                        |                                     |                                      |
| 23                  | 1.36                      | 0.19                       | 13.6                  | 57.3                  | 55.2   | 40.7                   | 2.6                                 | 12.6                   | 0.62                                | 8.2                                  |
| 30                  | 1.50                      | 0.21                       | 15.0                  | 57.3                  | 72     | 48.2                   | 3.8                                 | 13.6                   | 0.73                                | 8.0                                  |
| 37                  | 1.61                      | 0.23                       | 16.1                  | 57.3                  | 81.2   | 50.7                   | 4.7                                 | 15.2                   | 1.01                                | 7.4                                  |

450

451

452

453 Fig. 1: A schematic description of the model geometry. Solid black bars indicate the location  
454 of the buccal walls under maximal expansion, light shaded ones show the buccal walls at  
455 rest (minimal volume). The mouth is modeled as three attached cones that expand  
456 sequentially.  $L_1$ - $L_3$  correspond to the length of the three cones, whereas  $R_1$ - $R_4$  is the time-  
457 dependent radii of the cones.  $R_1$  is the gape (inlet). An increase in  $R_4$  represents the  
458 opening of the gill slits.

459

460

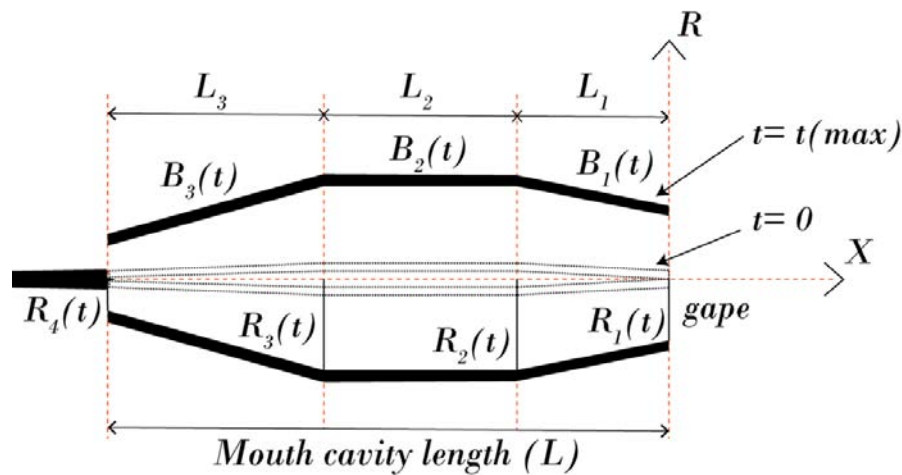

461

462

463

464

465 Fig 2. The relationships between age and gape diameter (A) and between gape diameter  
466 and buccal length (B) in *Sparus aurata* larvae ranging 8-37 DPH (n=22 individuals). Blue lines  
467 depict a linear regression between the two parameters ( $R^2 = 0.55$  and  $0.65$  for A and B  
468 respectively,  $P < 0.001$  for both).  
469

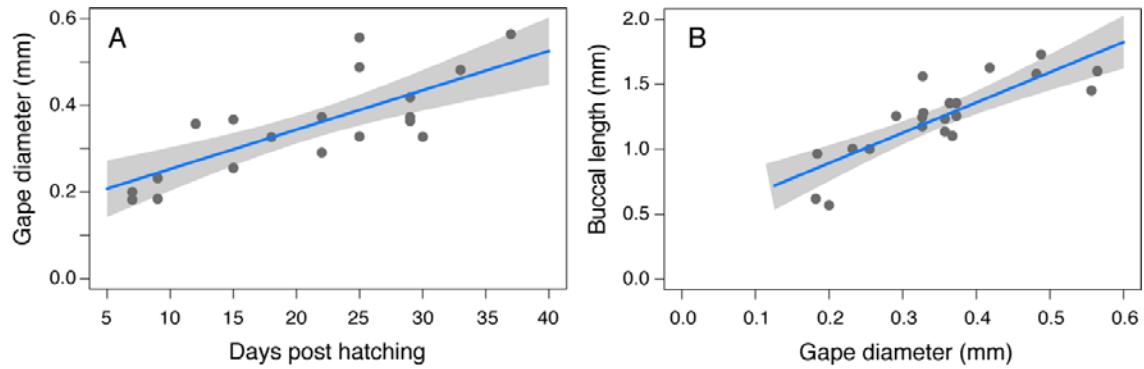

470

471

472

473

474 Fig 3. Buccal expansion kinematics across *S. aurata* ontogeny. Plots depict the radii of  $R_1$ - $R_4$   
475 as a function of time for 8, 13, 18, 23, 30 and 37 DPH larvae. Note that as larvae grow the  
476 overall time from mouth opening ( $R_1$ ) to the closing of the gills ( $R_4$ ) decreases, whereas the  
477 radii (and correspondingly buccal volume) increase. Furthermore, the timing of peak radius  
478 for each one of the mouth sections  $R_1$ - $R_4$  changes through larval growth.

479

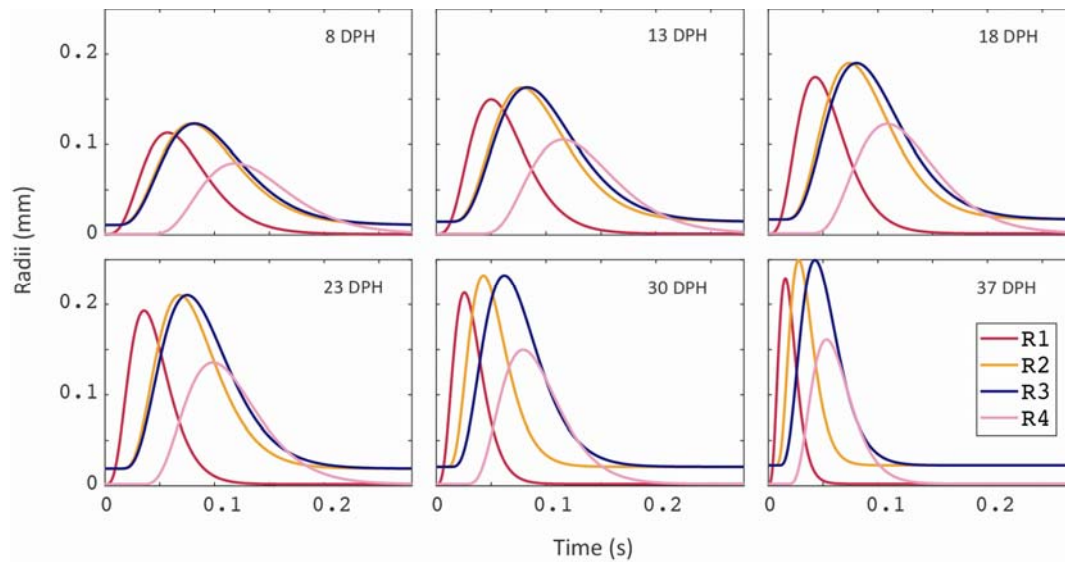

480

481



482 Fig 4: vector maps showing peak flow reversal for CFD models of 8, 13, 23, and 30 DPH  
483 larvae. Vector maps for each age were saved at the time when efflux (flux into the orifice)  
484 was maximal. Different x, y and speed scale are used in the four panels, however green  
485 color consistently represents low (and zero) flows. Also note that gape size at peak efflux  
486 decreases with increasing age.  
487

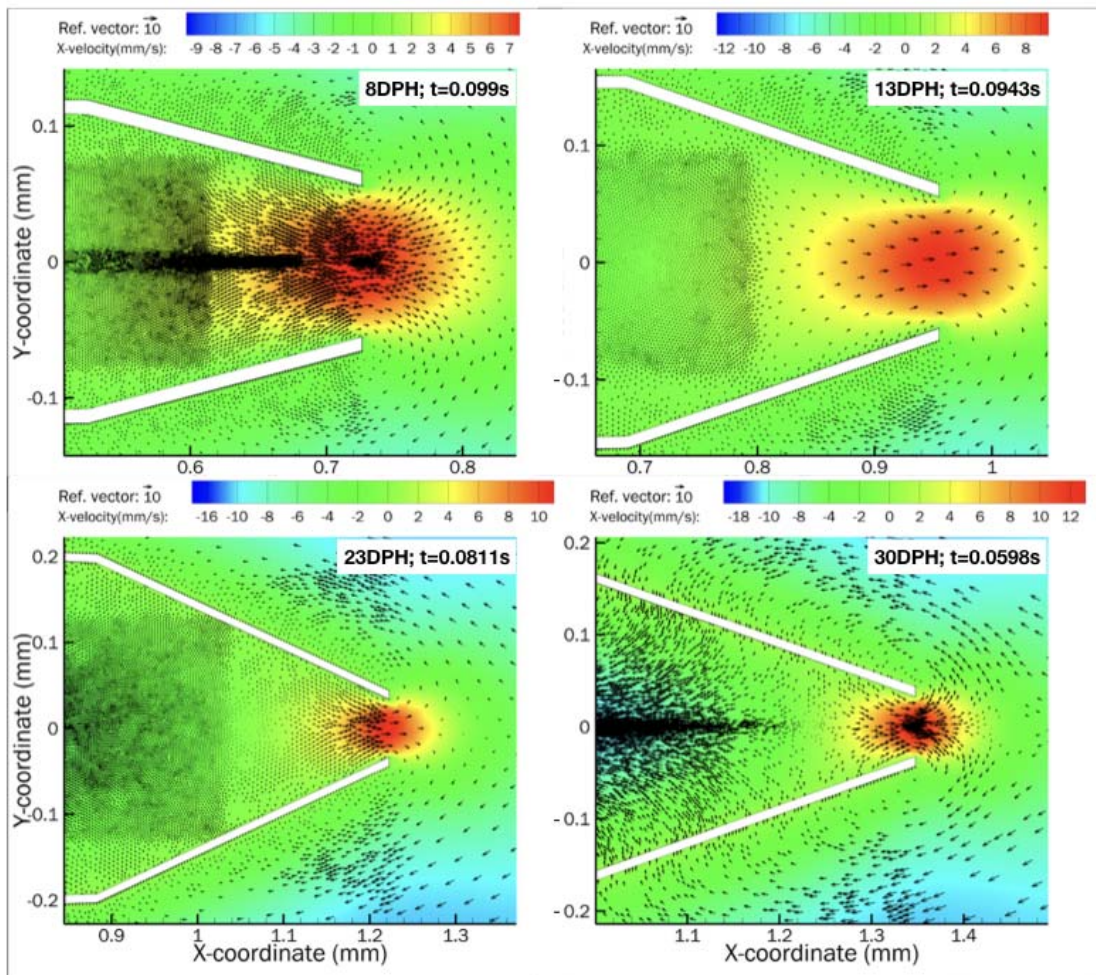

488  
489

490 Fig. 5: Gape size and flow rates as a function of time. Drawn are (A) the radius of  $R_1$  (gape  
491 size), (B) the influx into the mouth inlet (gape), (C) the efflux out of the gills and (D) the  
492 efflux out of the mouth inlet. As larvae grow, the influx at the gape and efflux at the gill  
493 increase, however the efflux at the gape (flow reversals; positive flow rate) decreases. Note  
494 the different scales and units for the Y-axes in A-D.

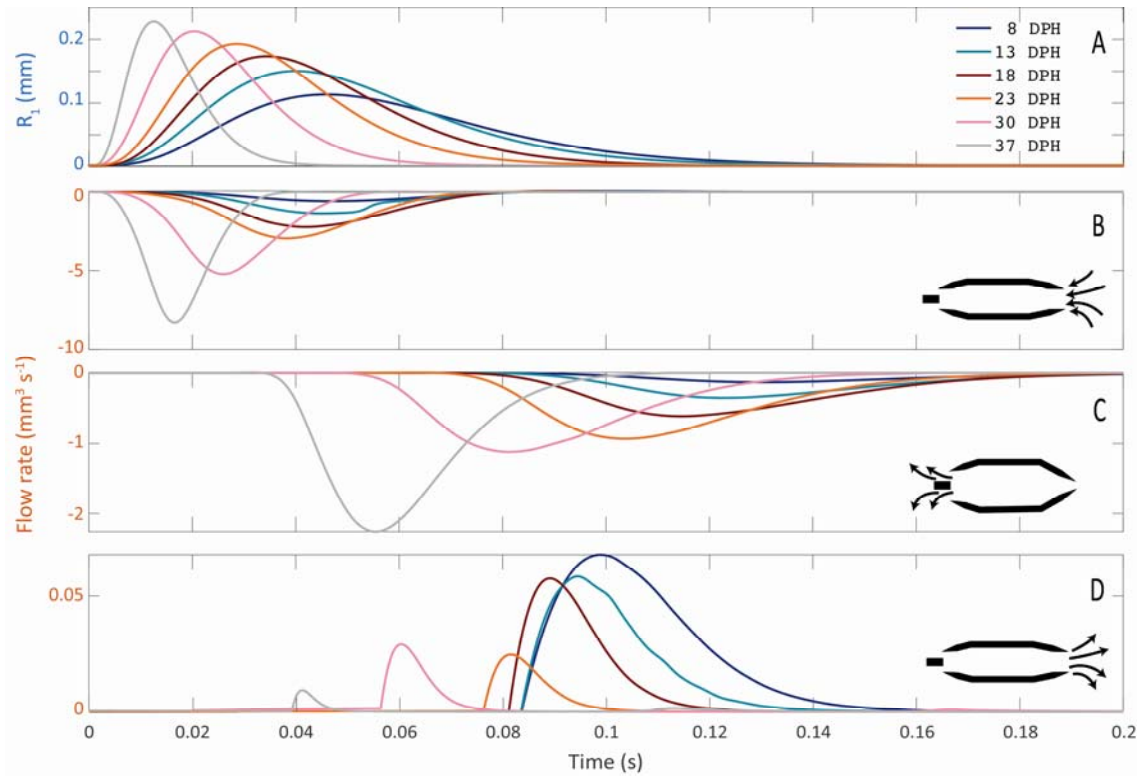

495

496

497 Fig 6: Scaling of peak flow speeds (A, B) and flow rates (C, D). Left column (A, C) depicts the  
498 inlet, right column (B, D) depicts outlet. Black lines represent exponential fits. Colors depict  
499 the different ages.

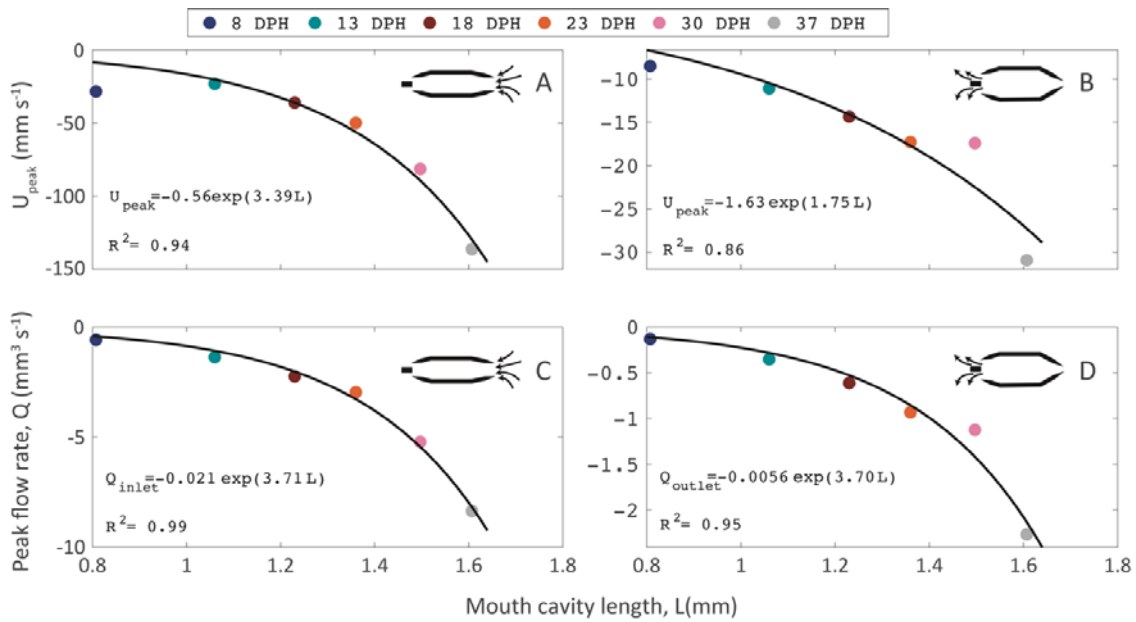

500

501

502

503 Fig 7: Hydrodynamic characterization of flow reversals. (A) the ratio of efflux to influx at the  
504 inlet (gape) decays as Womersley number decrease, and is most prominent at  $\alpha^2 < 4$ ,  
505 indicating that flow reversals occur under conditions where viscous effects dominate over  
506 temporal (wall movements) effects. Full symbols represent the observed kinematics; open  
507 symbols represent larger models where peak excursion and time to peak excursions were  
508 similar to the 8DPH case, representing “low-effort” strikes.

509

510

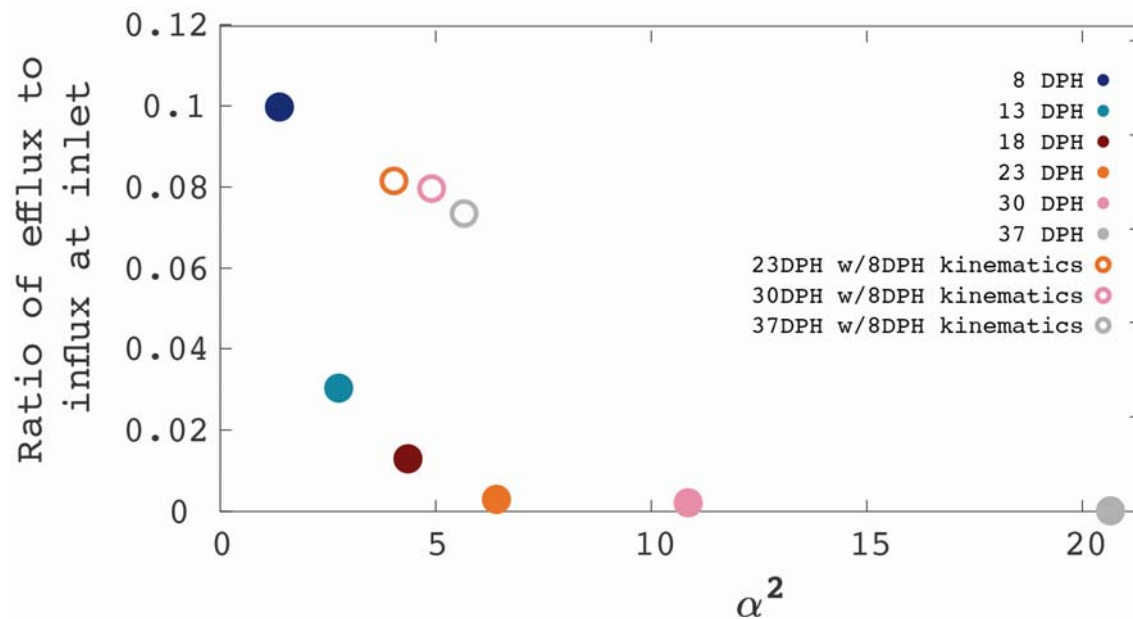

511

512

513

514
